# Supplementary material for: Comparison of Spatial Structures and Packaging of Phosphorybosil Pyrophosphate Synthetase 2 from Thermus thermophilus HB27 in Rhombohedral and Tetragonal Crystals
Source: MDPI journal article supplement (doi:10.3390/cryst11091128), 2021-09-16
Supplement: s1 [file s1]

## Supplementary Materials

# Comparison of Spatial Structures and Packaging of Phosphorybosil Pyrophosphate Synthetase 2 from *Thermus thermophilus* HB27 in Rhombohedral and Tetragonal Crystals

Yulia Abramchik <sup>1</sup>, Evgeniy Zayats <sup>1</sup>, Maria Kostromina <sup>1</sup>, Dmitry Lykoshin <sup>1</sup>, Ilya Fateev <sup>1</sup>, Irina Konstantinova <sup>1</sup>, Nadezda Zhukhlistova <sup>2</sup>, Vladimir Timofeev <sup>2</sup>, Inna Kuranova <sup>2</sup>, and Roman Esipov <sup>1,\*</sup>

<sup>1</sup> Shemyakin and Ovchinnikov Institute of Bioorganic Chemistry, Miklukho-Maklaya Str., 16/10, GSP-7, Moscow 117997, Russia; ugama@yandex.ru (Y.A.); eaz96post@gmail.com (E.Z.); kostromasha@mail.ru (M.K.); ldd-94@ya.ru (D.L.); ifateev@gmail.com (I.F.); kid1968@yandex.ru (I.K.)

<sup>2</sup> Shubnikov Institute of Crystallography of Federal Scientific Research Centre "Crystallography and Photonics", Russian Academy of Sciences, Leninskii Prospect 59, Moscow 119333, Russia; nez@ns.crys.ras.ru (N.Z.); tostars@mail.ru (V.T.); inna@crys.ras.ru (I.K.)

\* Correspondence: esipov@ibch.ru

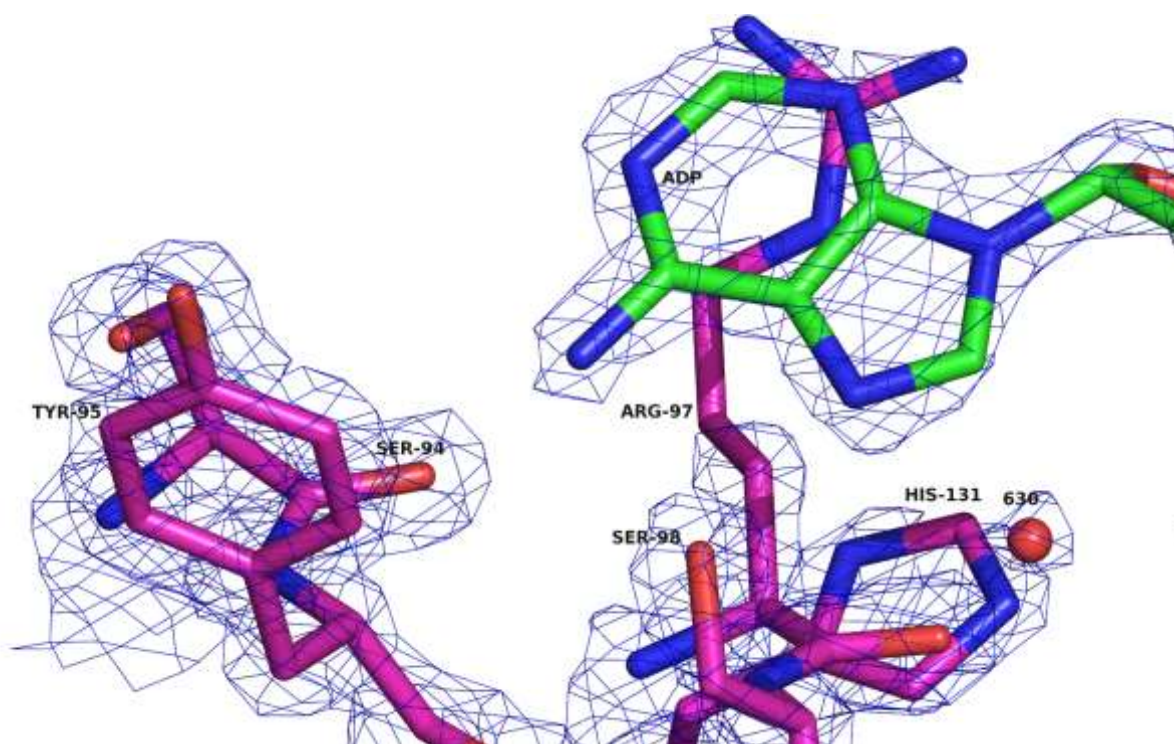

**Figure S1.** The fragment of the electron density map. The 2Fo-Fc is contoured at 2 r.m.s.d.
